# Supplementary material
Source: publisher figshare collection journal article supplement (https://gsapubs.figshare.com/articles/dataset/_/15101466)
Supplement: Supplementary file 1 [file 1]

Xinran Xu, Yanjie Tang, Jifeng Ying, Xinmiao Zhao, and Yan Xiao, 2021, Three-stage modification of lithospheric mantle: Evidence from petrology, in-situ trace elements, and Sr isotopes of mantle xenoliths in the Cenozoic basalts, northeastern North China Craton: GSA Bulletin, <https://doi.org/10.1130/B36140.1>.

## Supplemental Material

**Table S1.** Petrological information and equilibrium temperature estimation for the studied samples.

**Table S2.** Major element compositions (wt%) of minerals.

**Table S3.** Trace element concentrations (ppm) of Cpx in xenoliths determined by LA-ICP-MS.

**Table S4.** In situ Sr isotopic compositions of Cpx in the xenoliths.
